# Supplementary material for: Genome-Wide Annotation and Comparative Analysis of Cytochrome P450 Monooxygenases in Basidiomycete Biotrophic Plant Pathogens
Source: PubMed Central journal article supplement (PMC4633277; doi:10.1371/journal.pone.0142100), 2015-11-04

# Taxonomy

- Agaricomycotina
- Pucciniomycotina
- Ustilaginomycotina

1

4

3

2

7

5

9

8

6

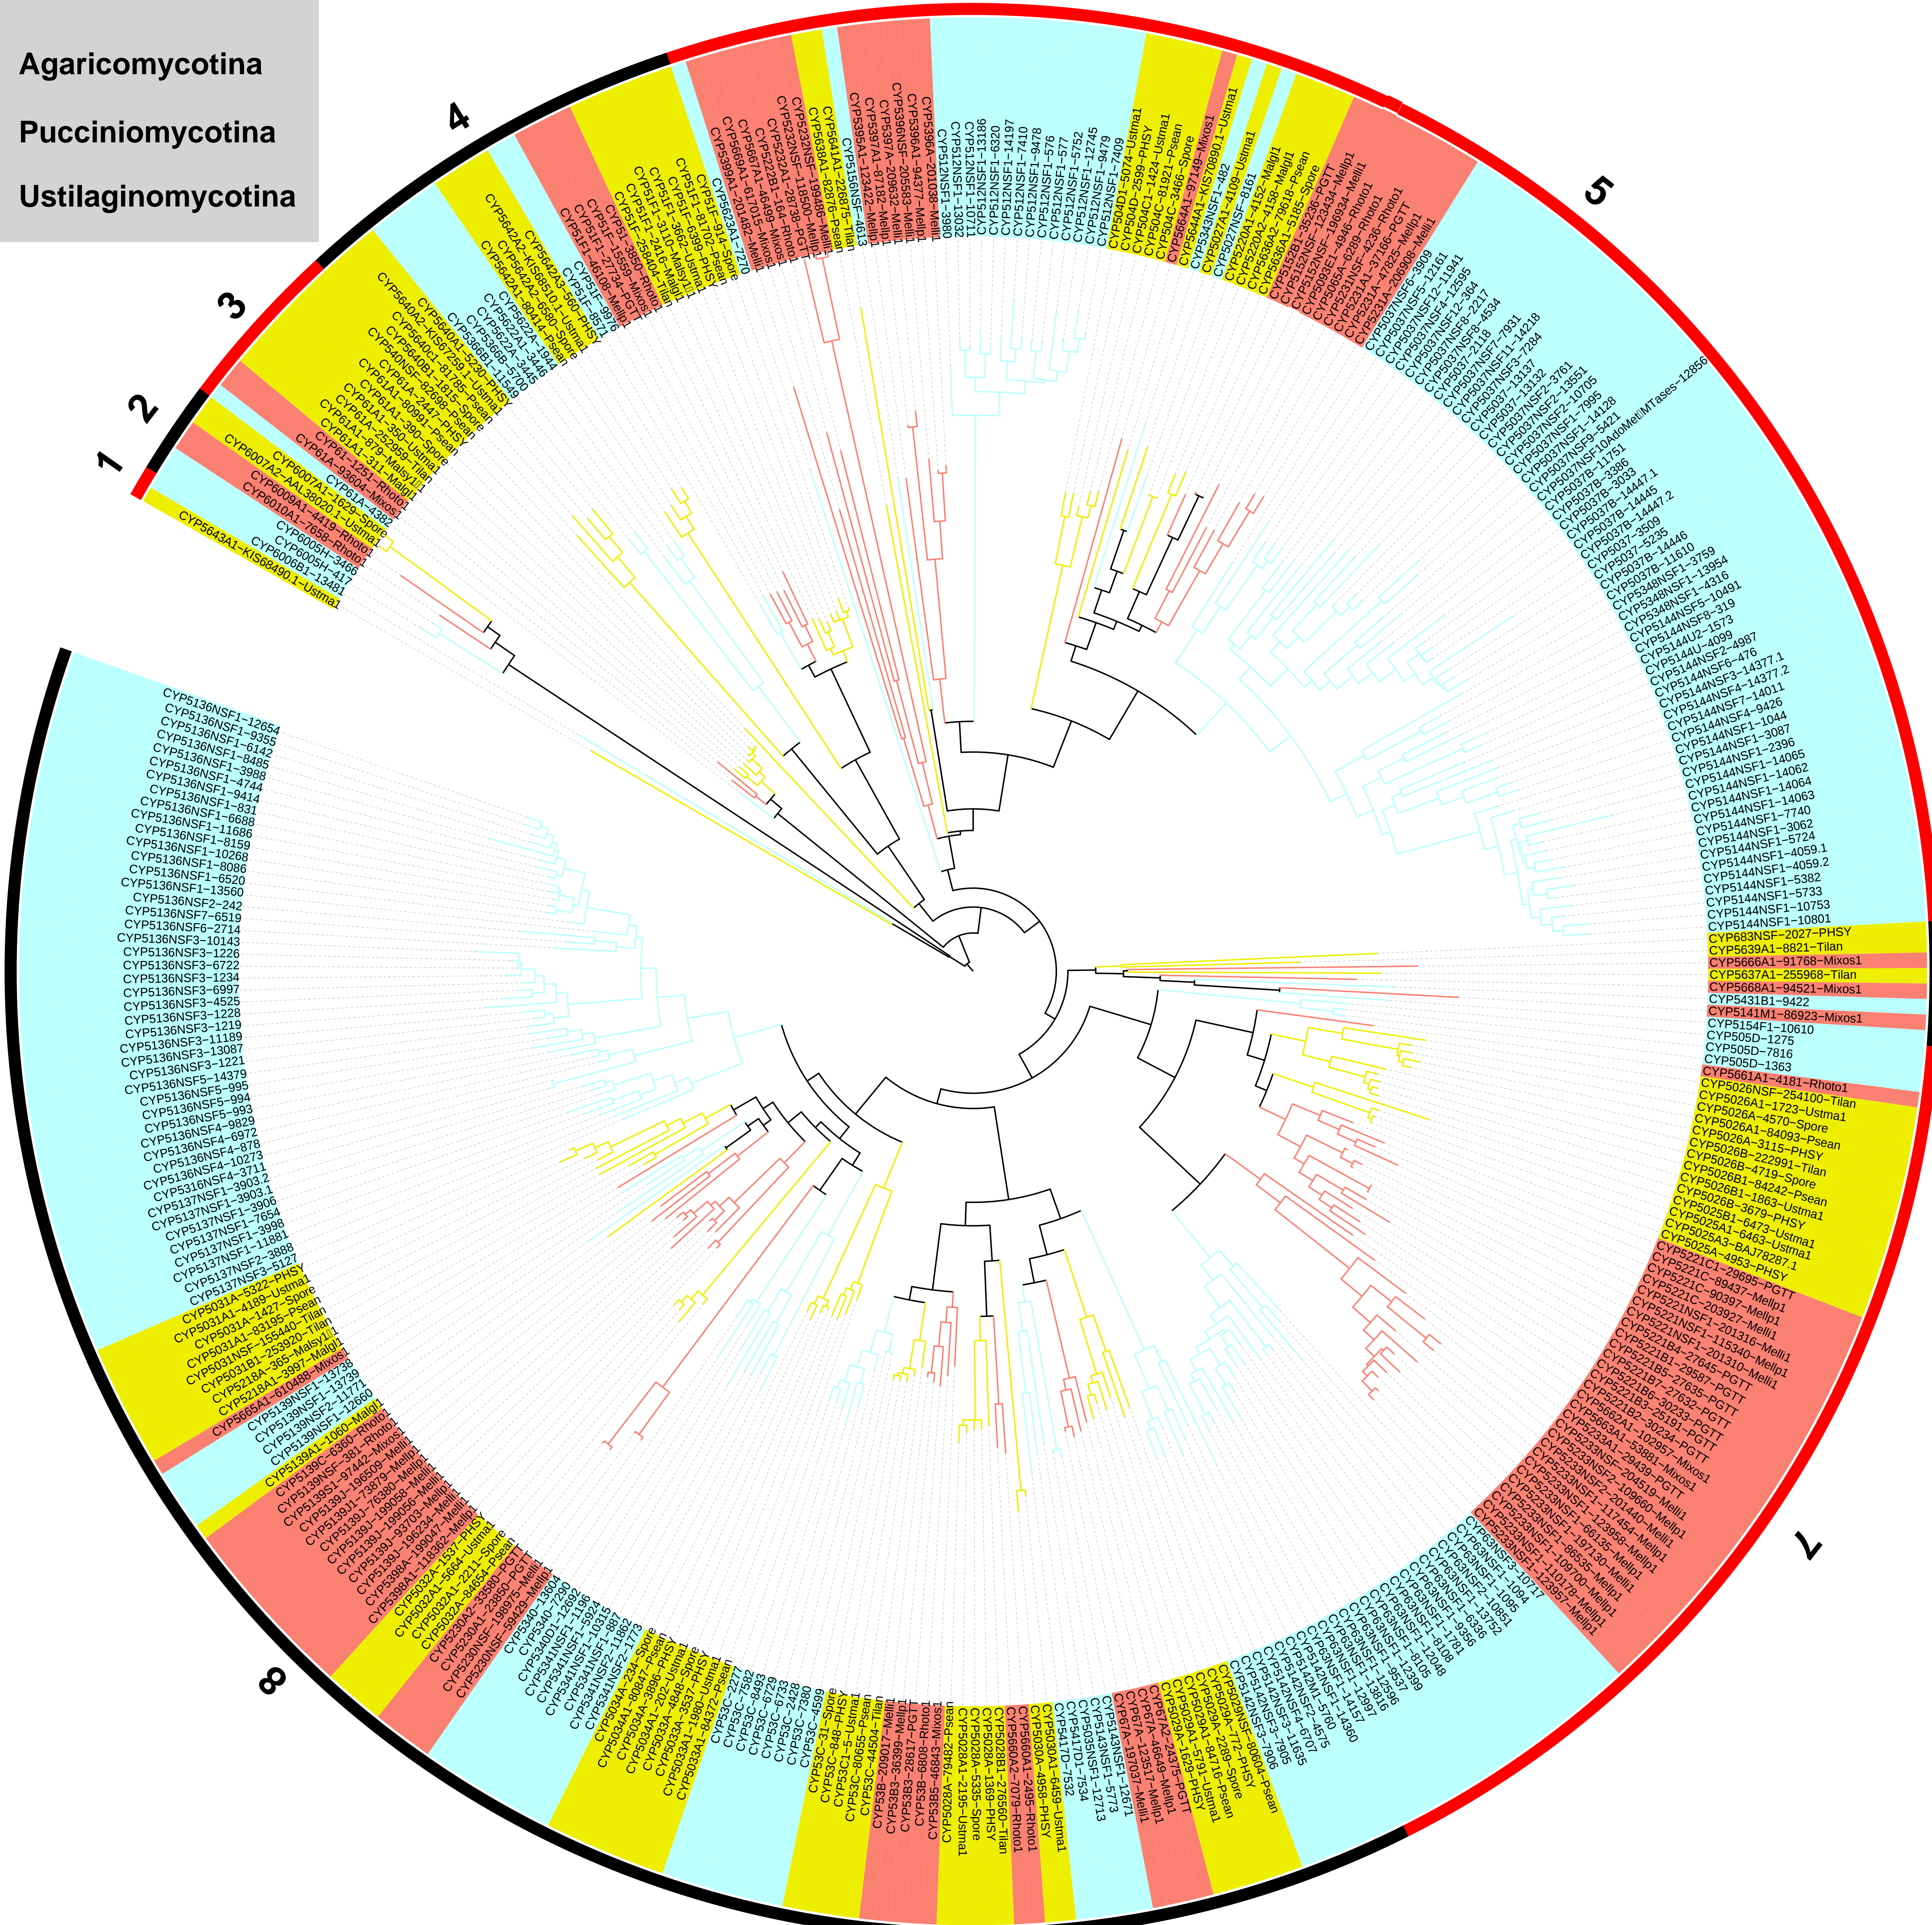

Supplement: pone.0142100.s001.pdf [file pone.0142100.s001.pdf]
